# Supplementary material for: The ROS-producing enzyme NADPH oxidase/RBOH is a Ca2+ channel regulated by protons in the eukaryotic kingdom
Source: Research Square preprint supplement (doi:10.21203/rs.3.rs-4840681/v1), 2024-08-07
Supplement: Supplementary file 1 [file 20cd53f83f17e57fd5a0a58b.docx]

**Extended Data Figures**

**
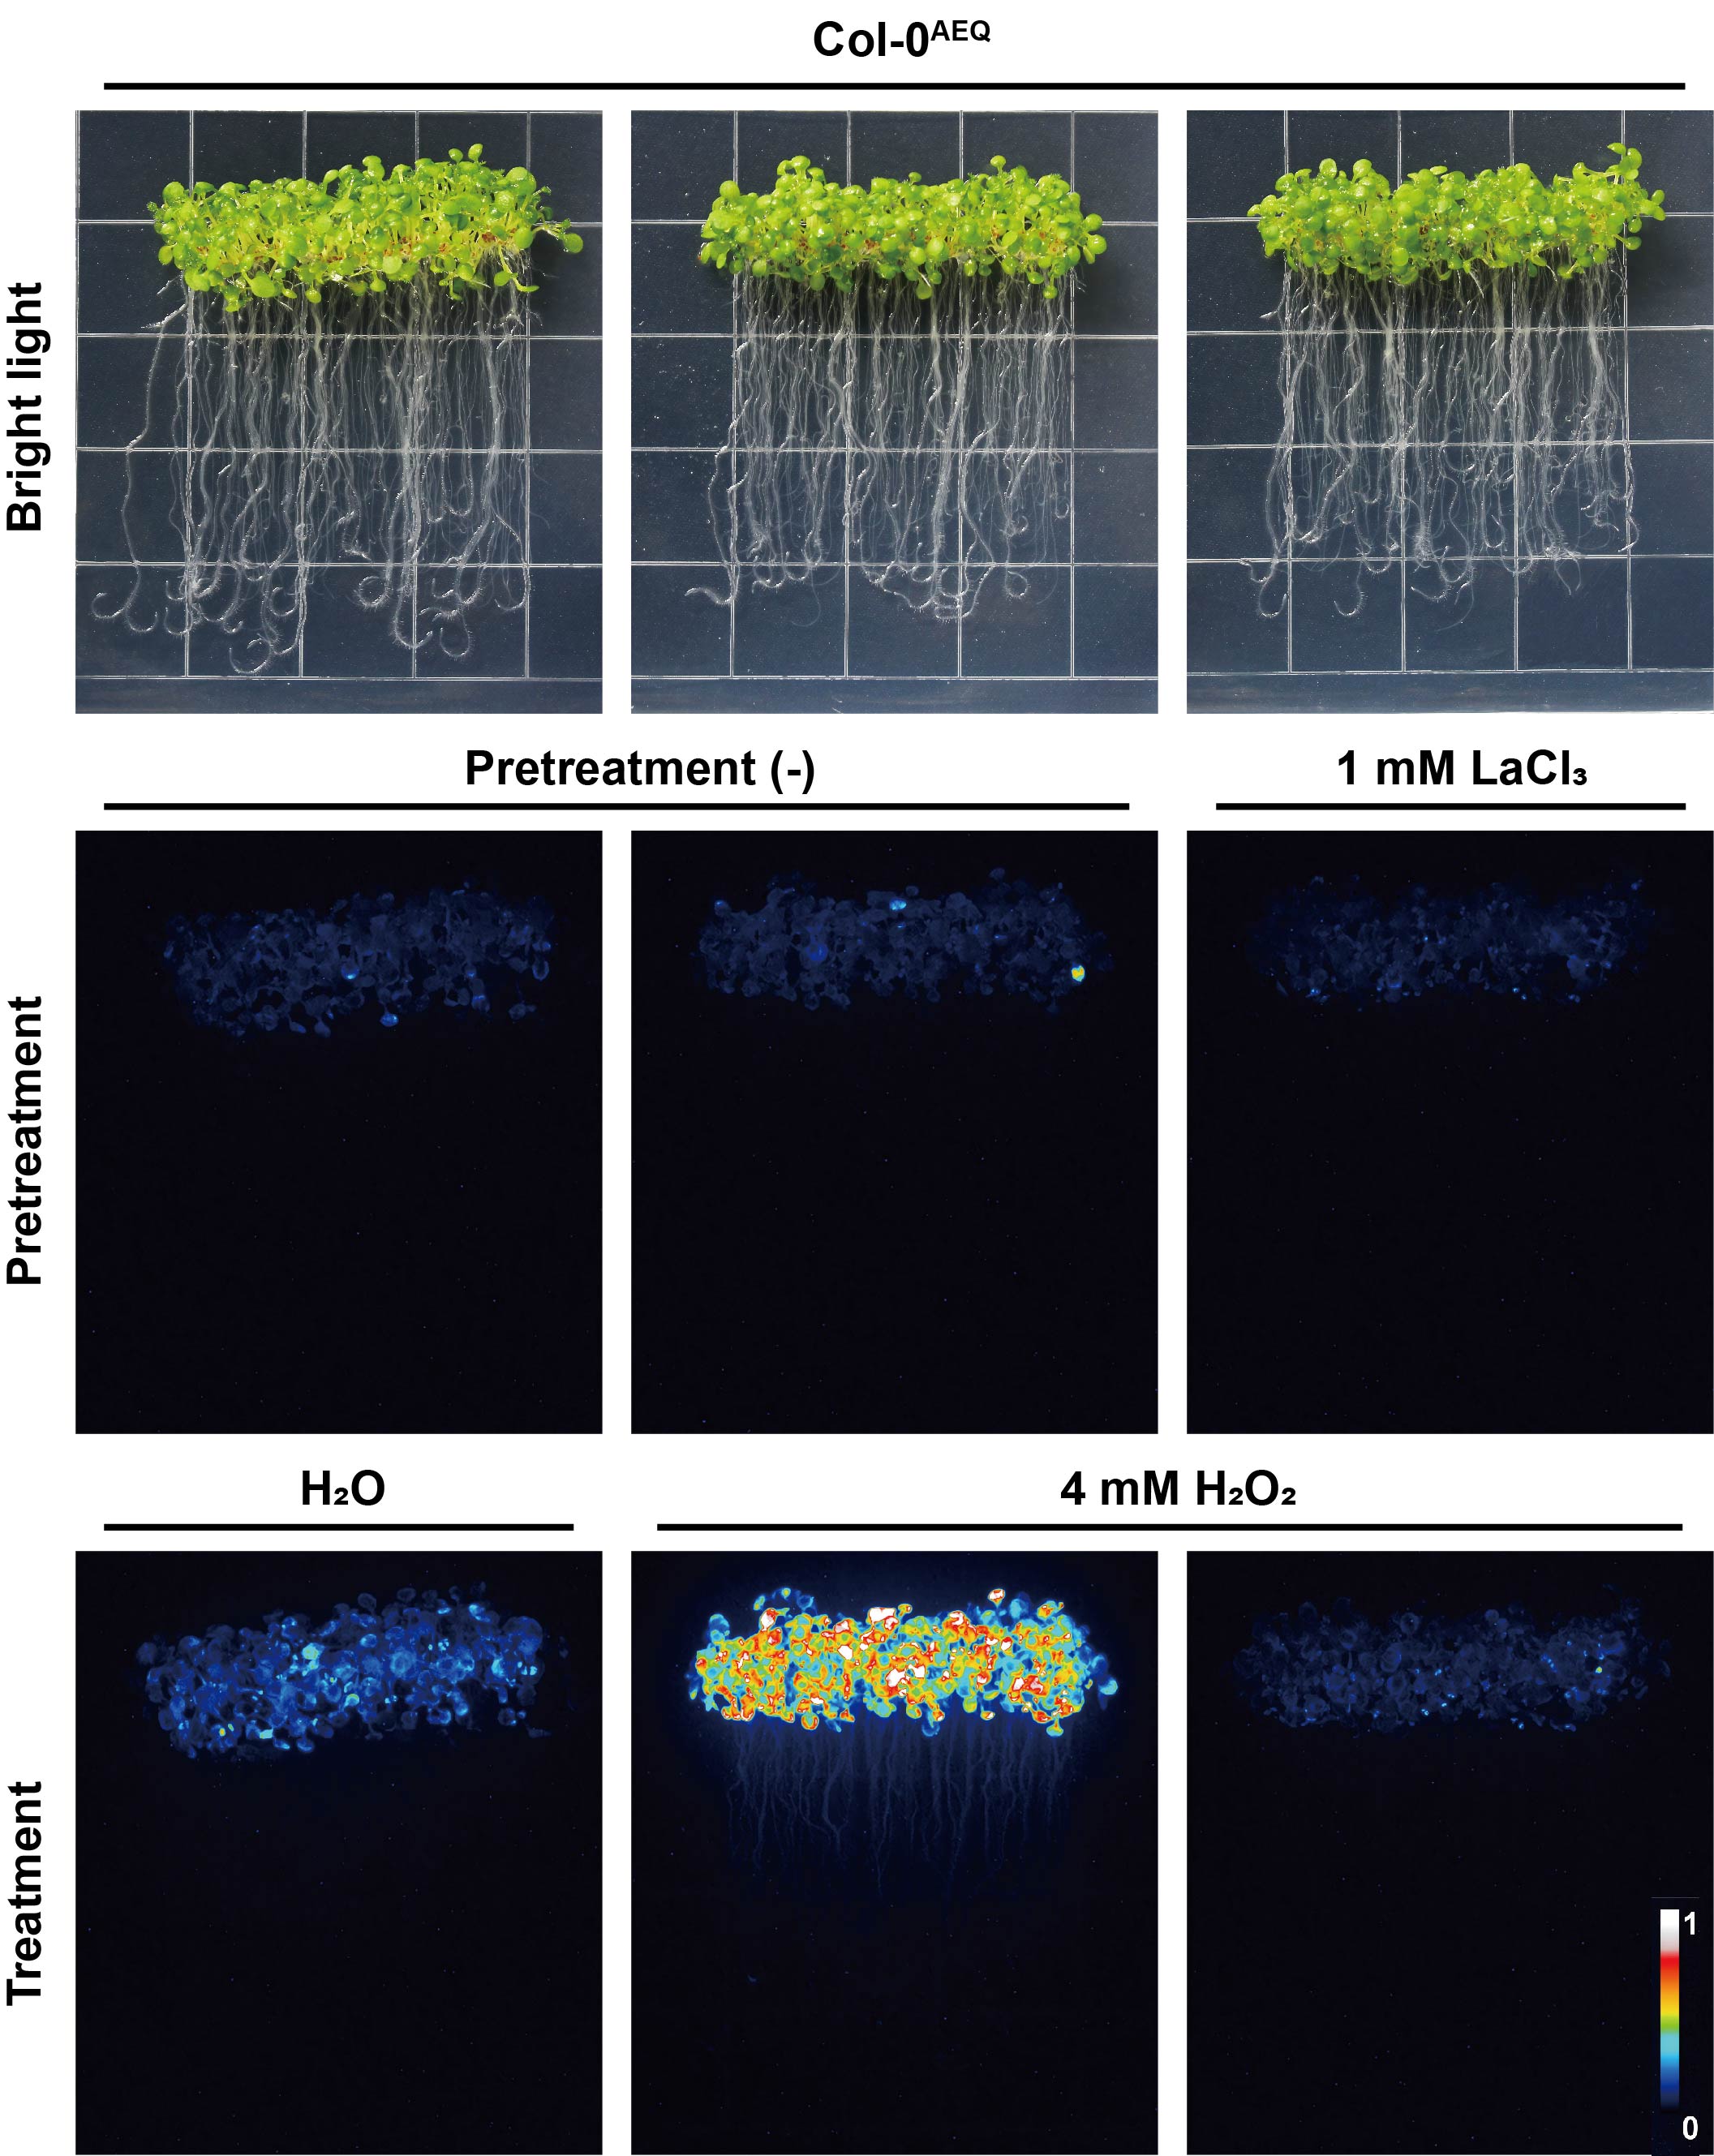
**

**Extended Data Fig. 1 | H2O2 triggers the specific cytosolic [Ca2+]cyt increase in Col-0AEQ.**

Images of H2O2-induced Ca2+ increases scaled by a pseudo-colour bar in aequorin-expressing wild-type (WT) Col-0. Treatment with LaCl3 as a inhibitor of calcium channels resulted in a significant decrease in fluorescence values.


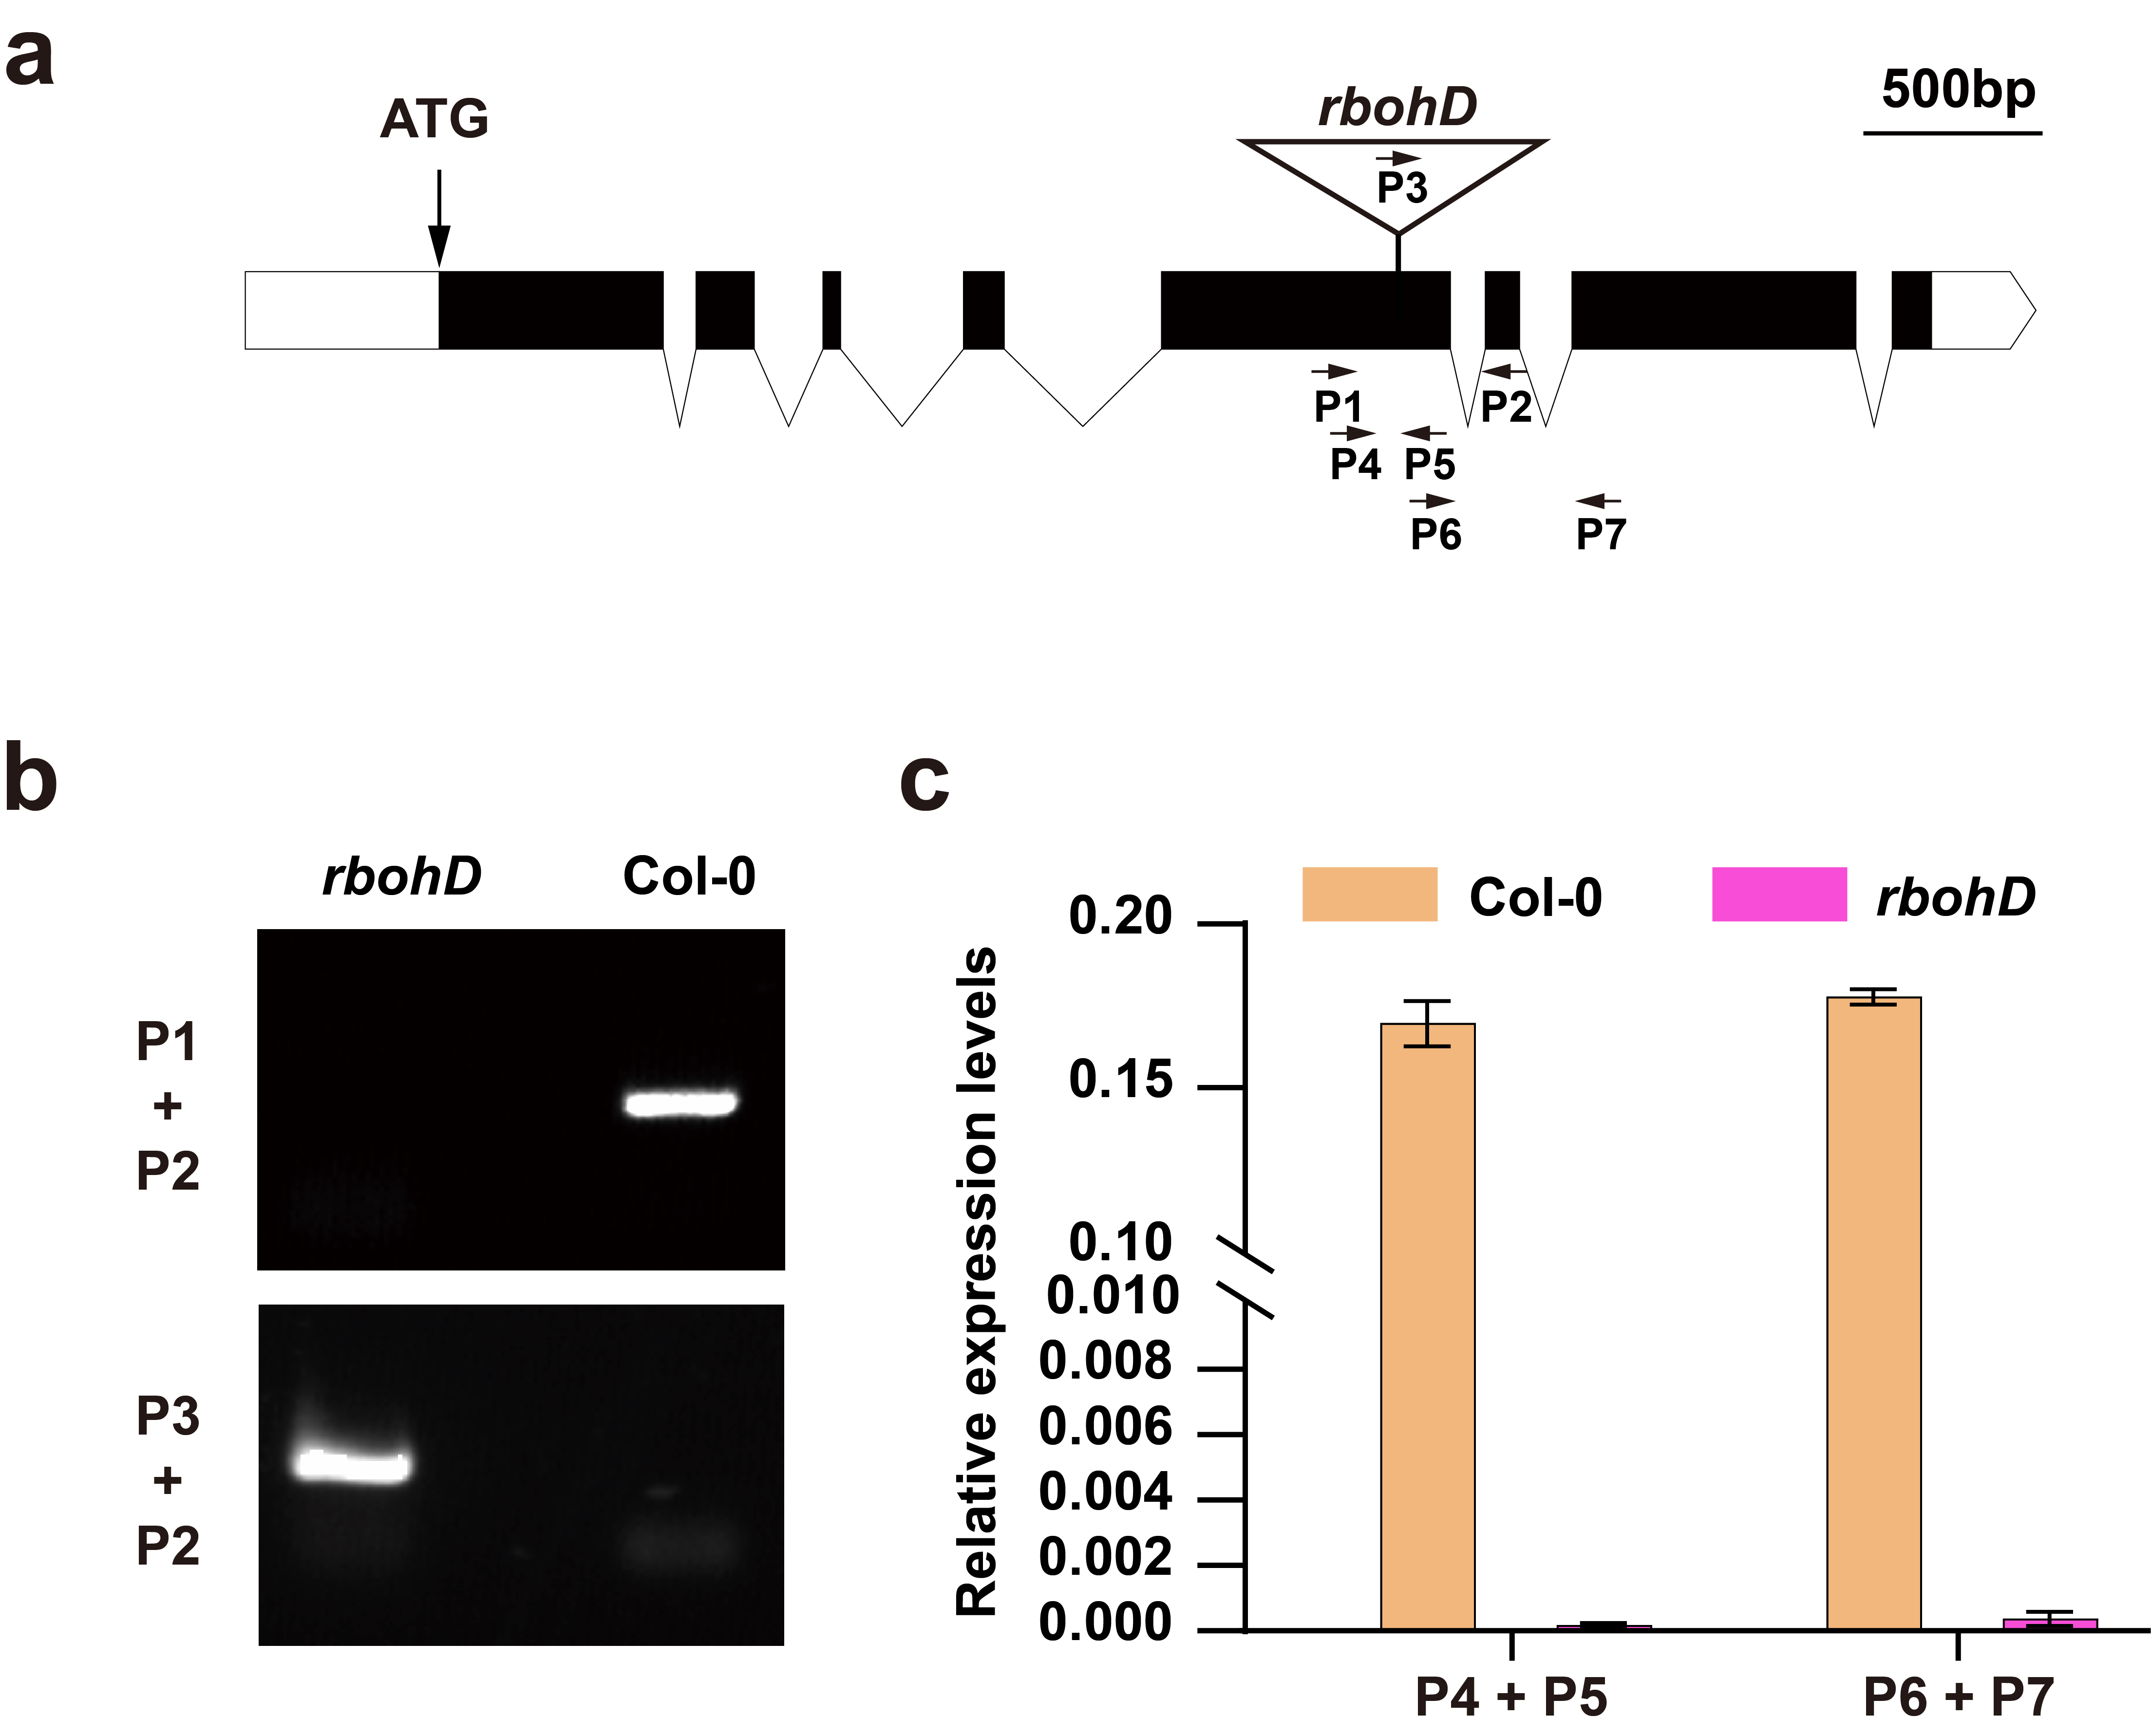


**Extended Data Fig. 2 | Genotyping of Arabidopsis *rbohD* mutant.**

**a**. Schematic representation of the exon-intron structure of the RBOHD gene and the transposon insertion site, with the transposon in the fifth exon, the PCR primers and the real-time quantitative polymerase chain reaction (qRT-PCR) primers binding to the gene are shown in the figure. **b**, PCR identification of mutant *rbohD* with primers P1/P2 and P2/P3. **c**, Detection of *RBOHD* mRNA expression by primers pairs of P4/P5 and P6/P7in Col-0 and *rbohD* mutant based on qRT-PCR.

**
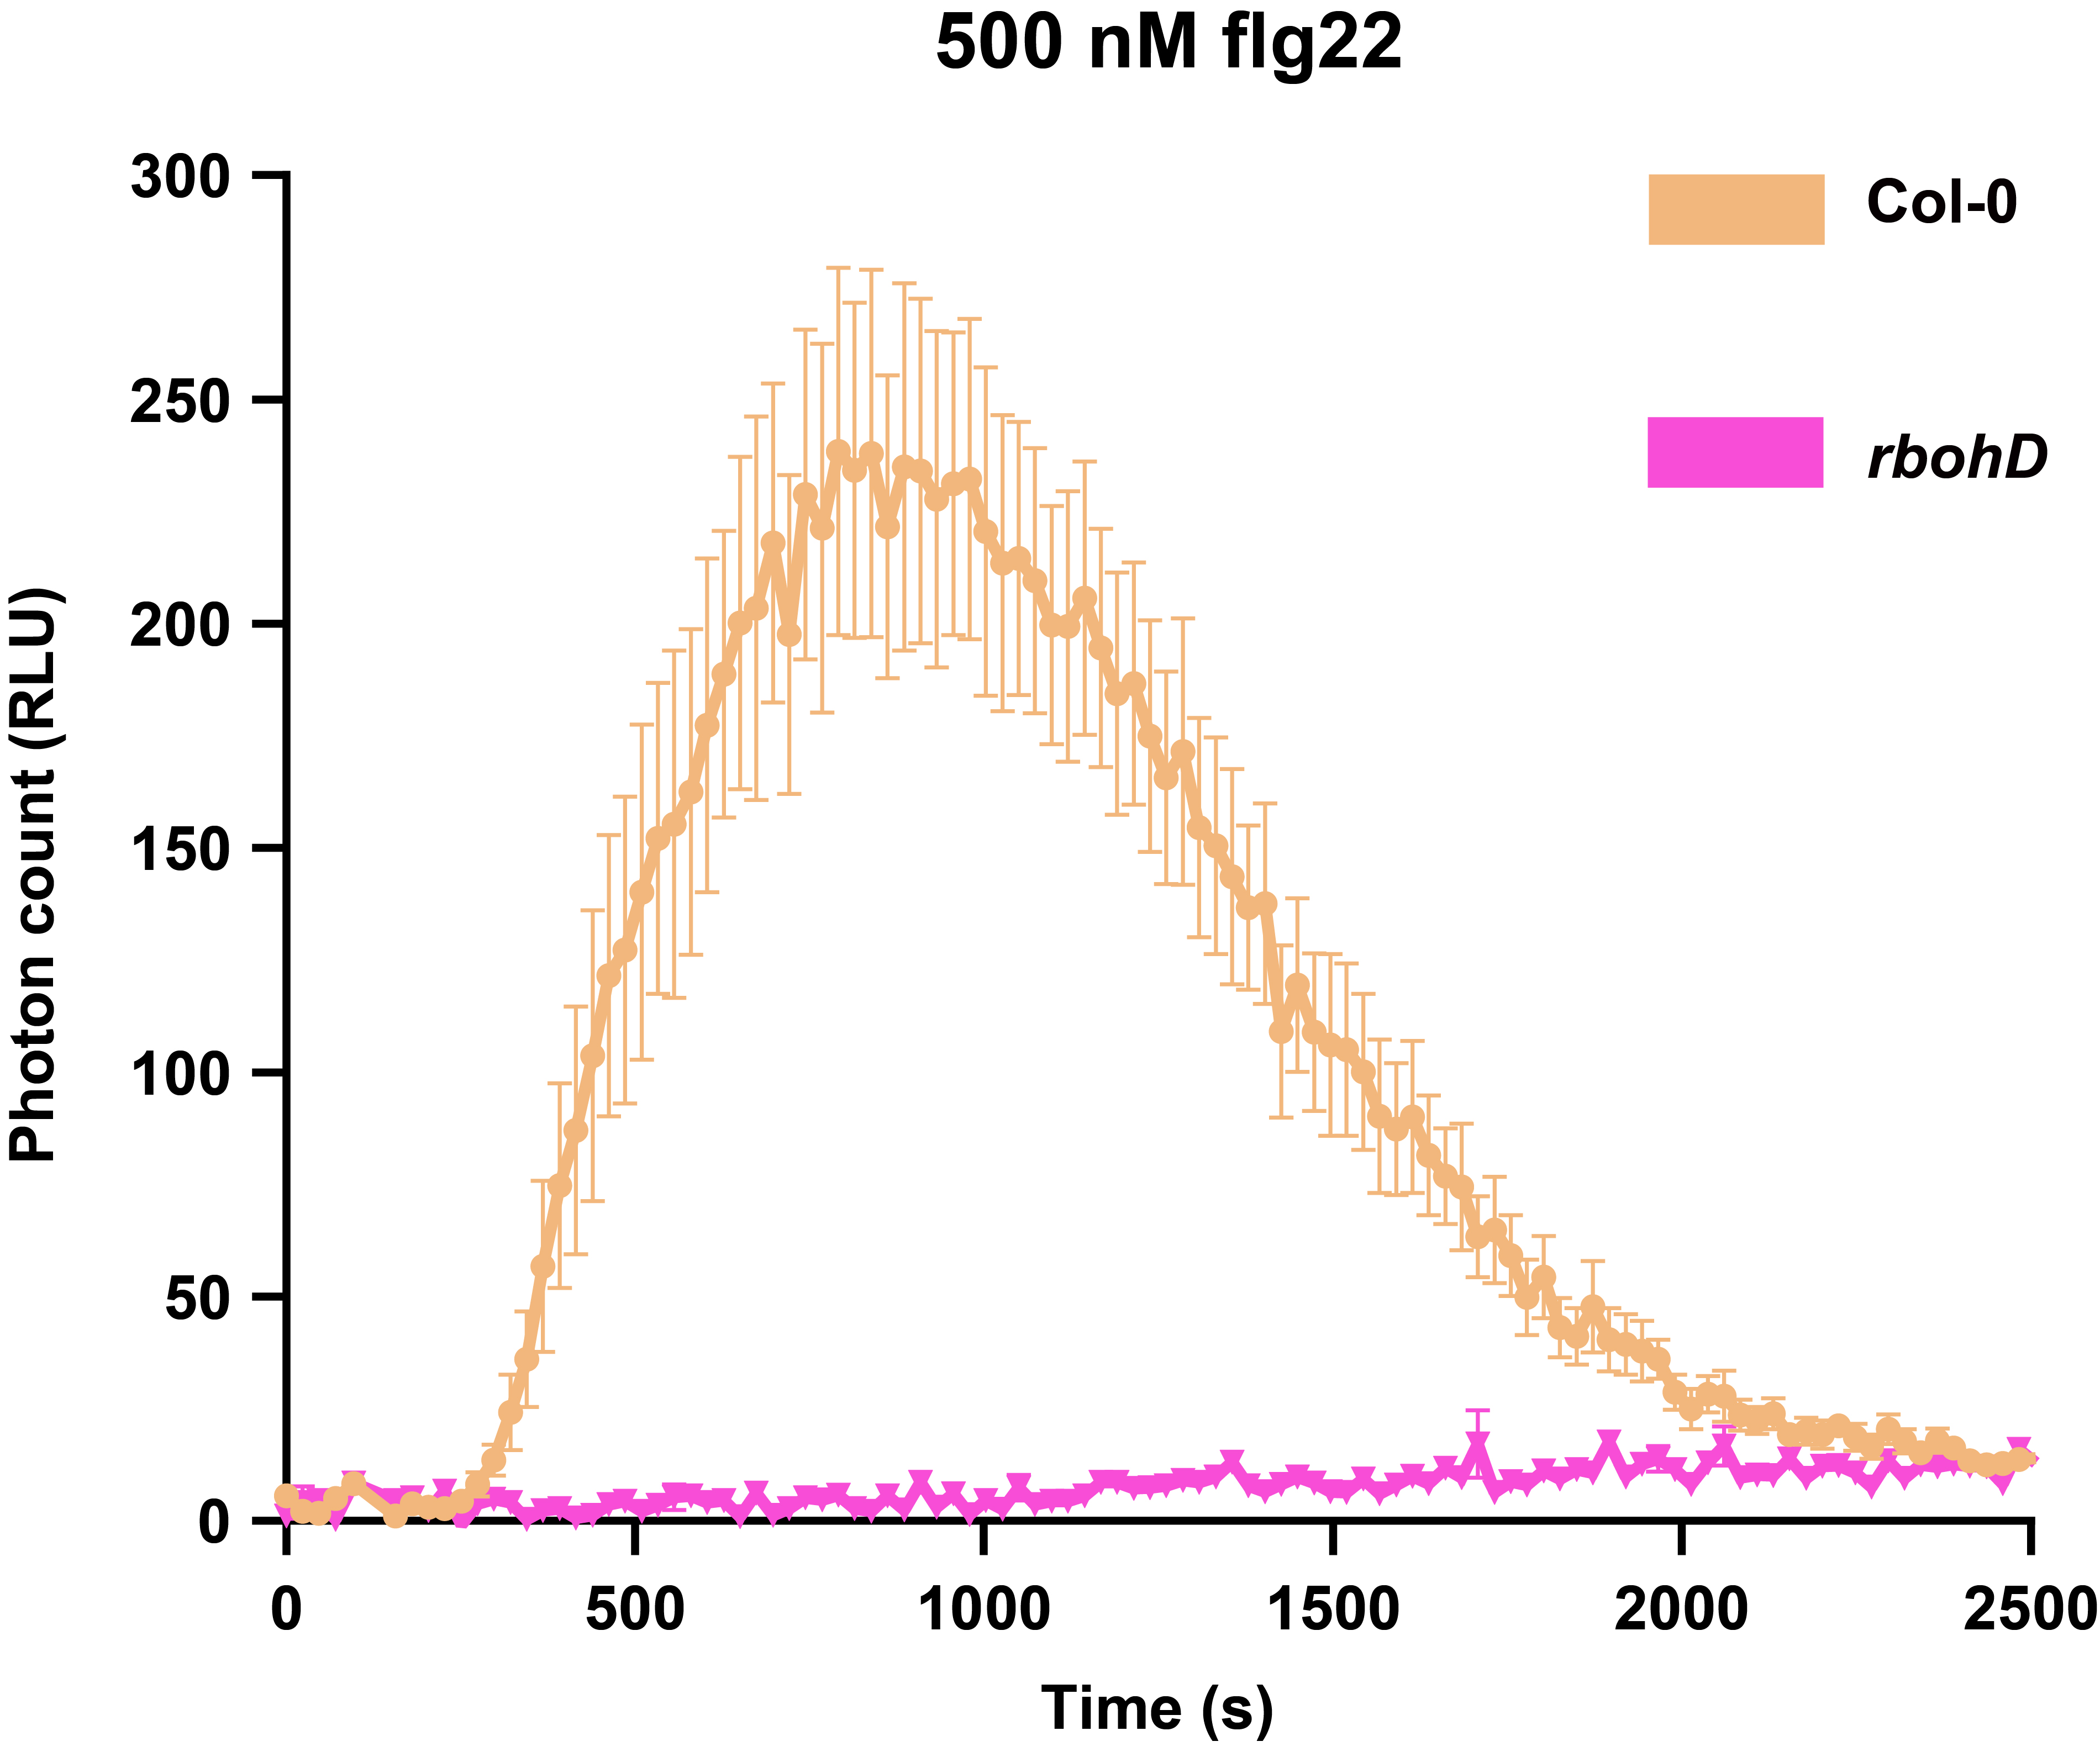
**

**Extended Data Fig. 3 | flg22-induced ROS burst was impaired in *rbohD*.**

Analysis of ROS level detection in Col-0 and *rbohD* mutant induced by 500 nM flg22. Data are mean ± s.e.m., n=8.

**
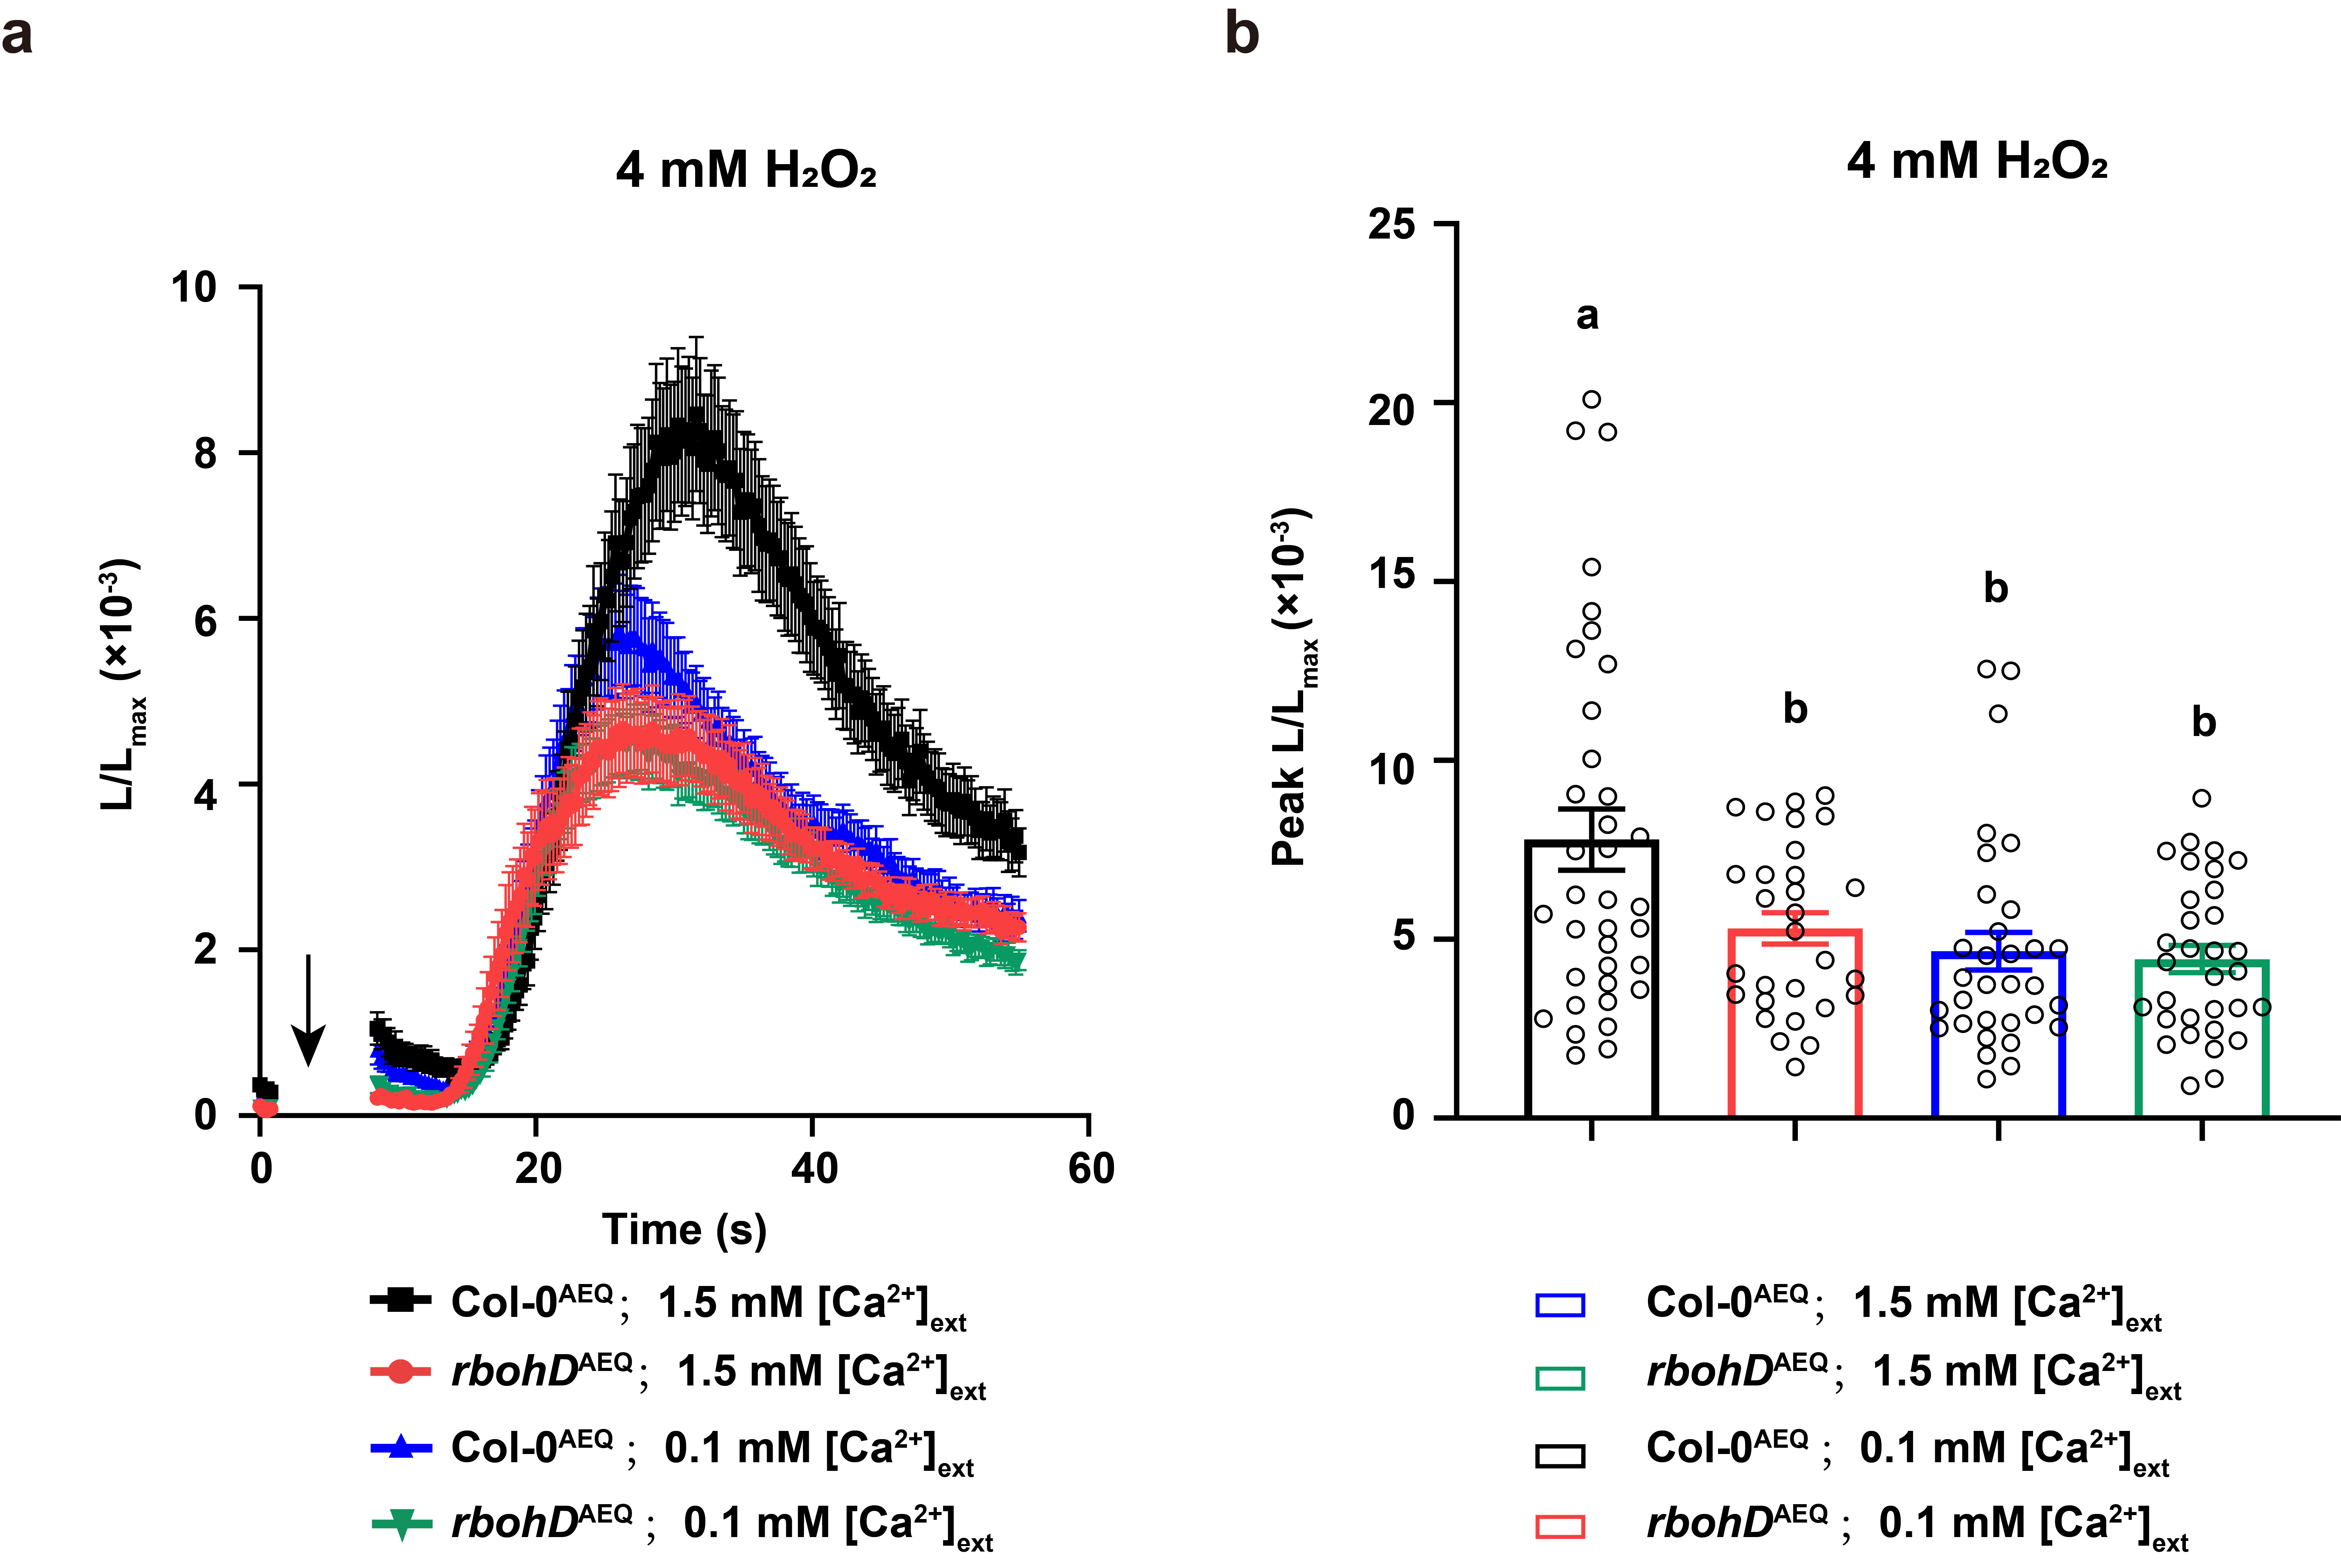
**

**Extended Data Fig. 4 | H2O2-induced cytosolic [Ca2+]cyt increase in Col-0AEQ and *rbohD*AEQ under different extra Ca2+ conditions.**

**a-b**, Time course (**a**) and quantification (**b**) of [Ca2+]cyt in Col-0AEQ and *rbohD*AEQ seedlings induced by 4 mM H2O2. Data are presented as mean ± s.e.m. and n≥29 biologically independent seedlings.

**
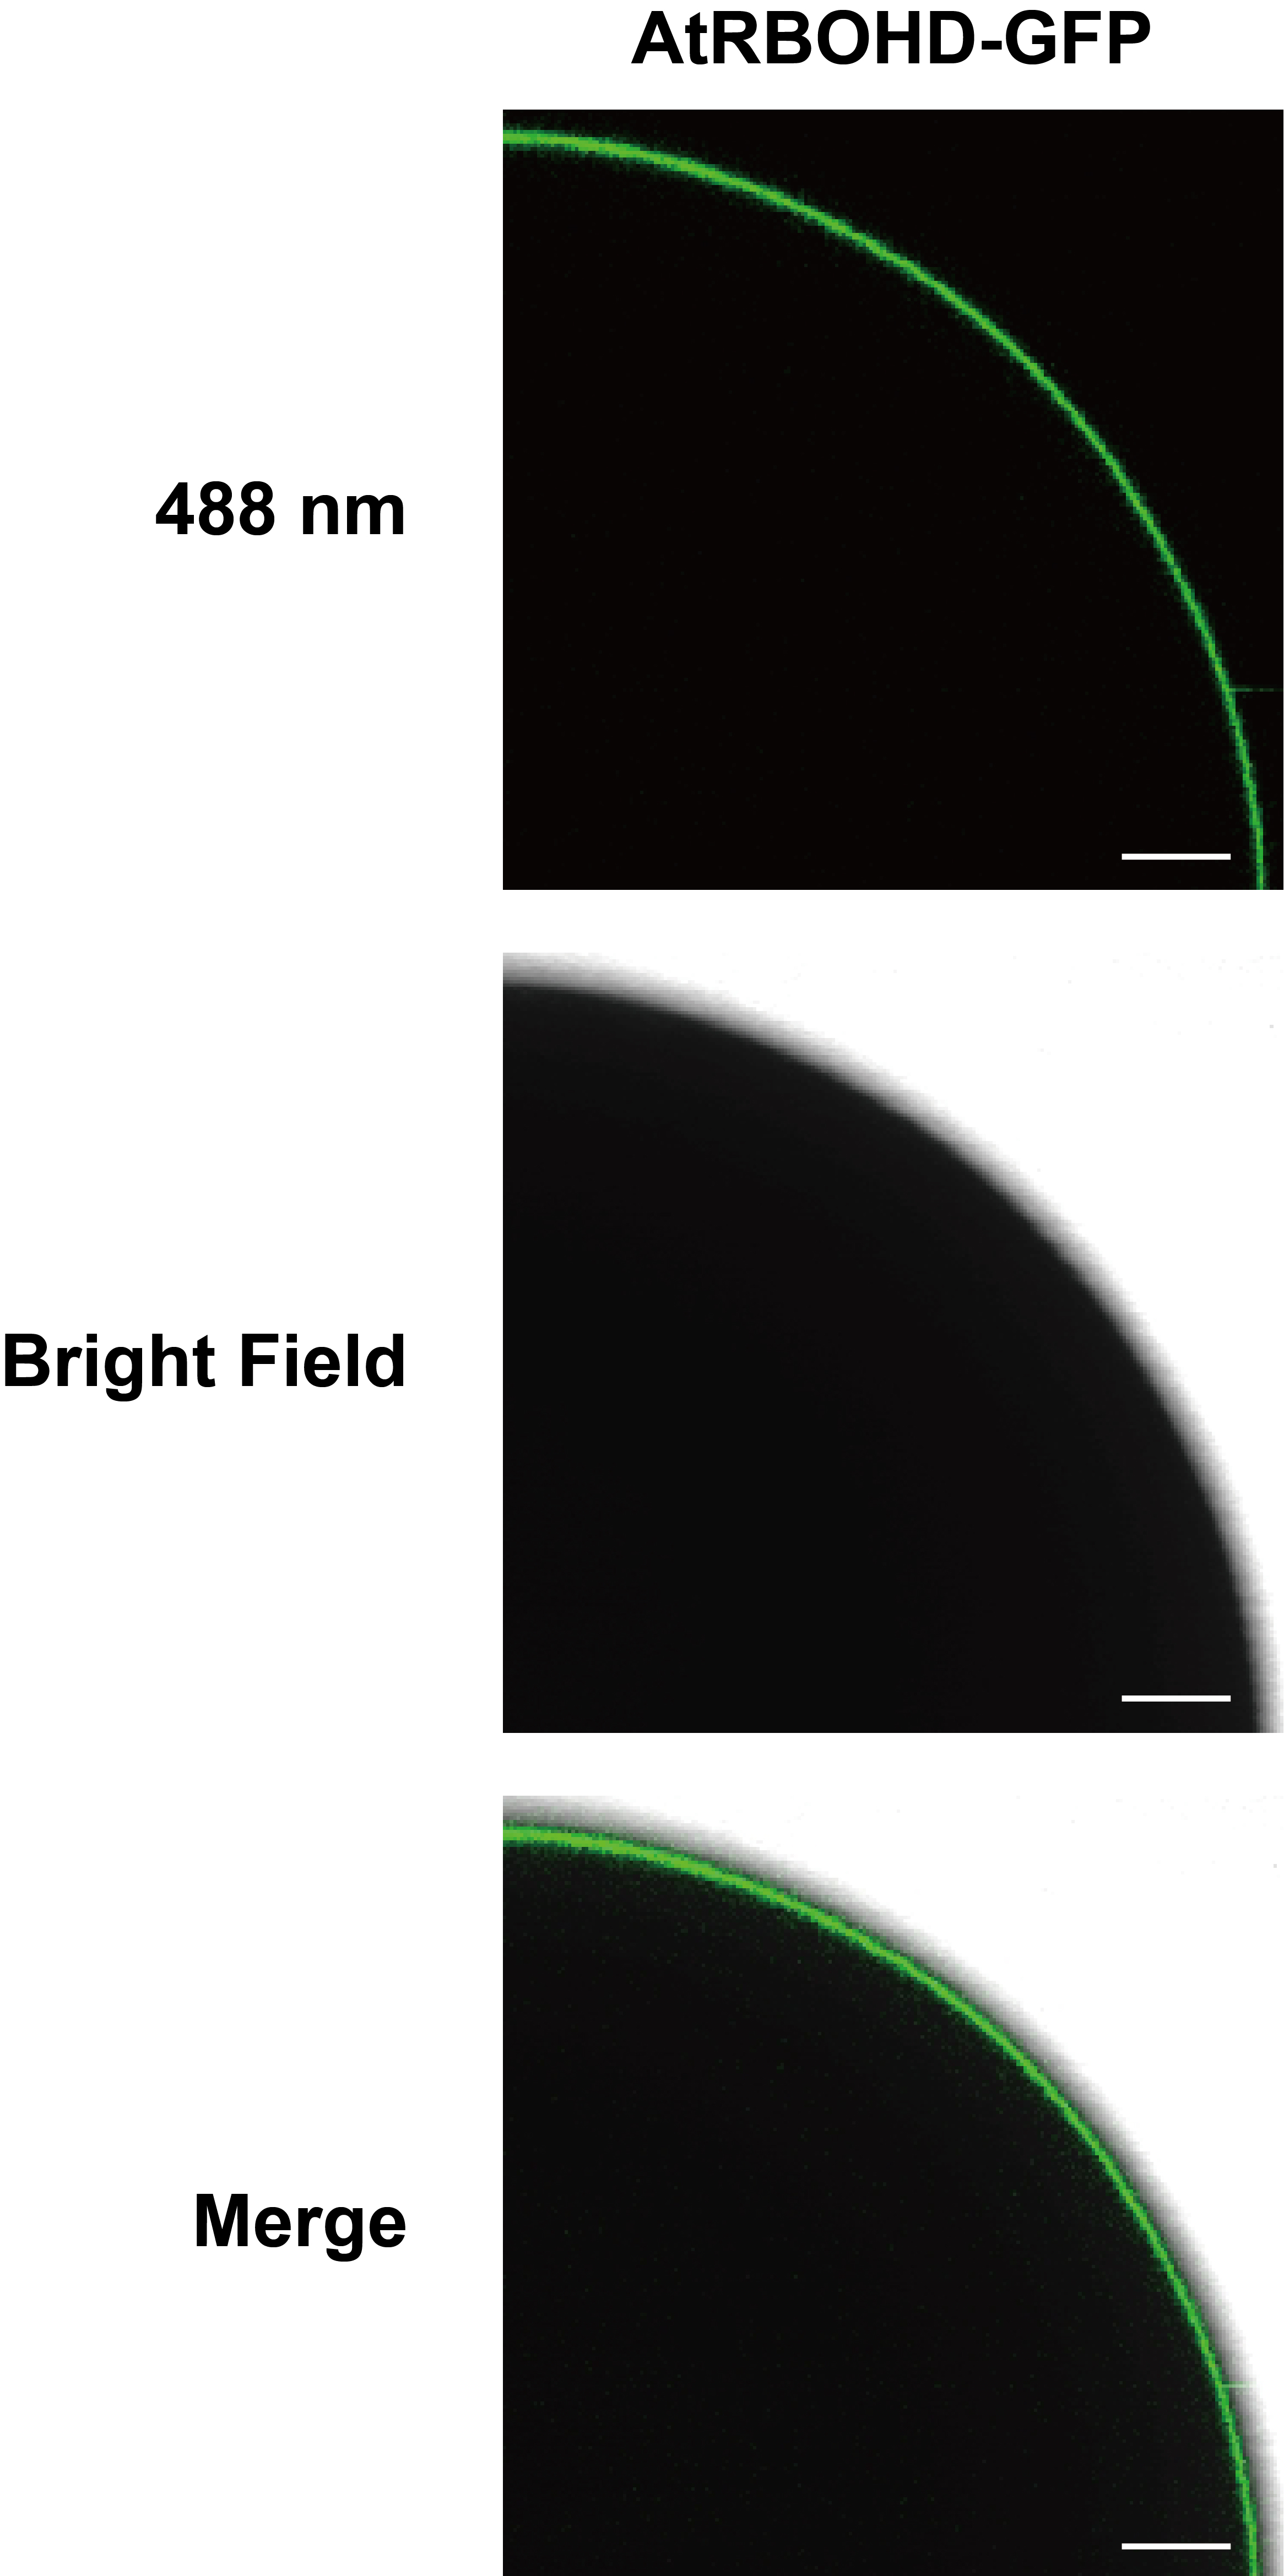
**

**Extended Data Fig. 5 | Localization of RBOHD-GFP on plasma membrane.**

Two days after the cRNA of RBOHD-GFP was injected into *Xenopus* oocytes for expression, the fluorescent signals were observed under a fluorescent confocal Lecia SP8 microscope. Scale bar=200 μm.

**
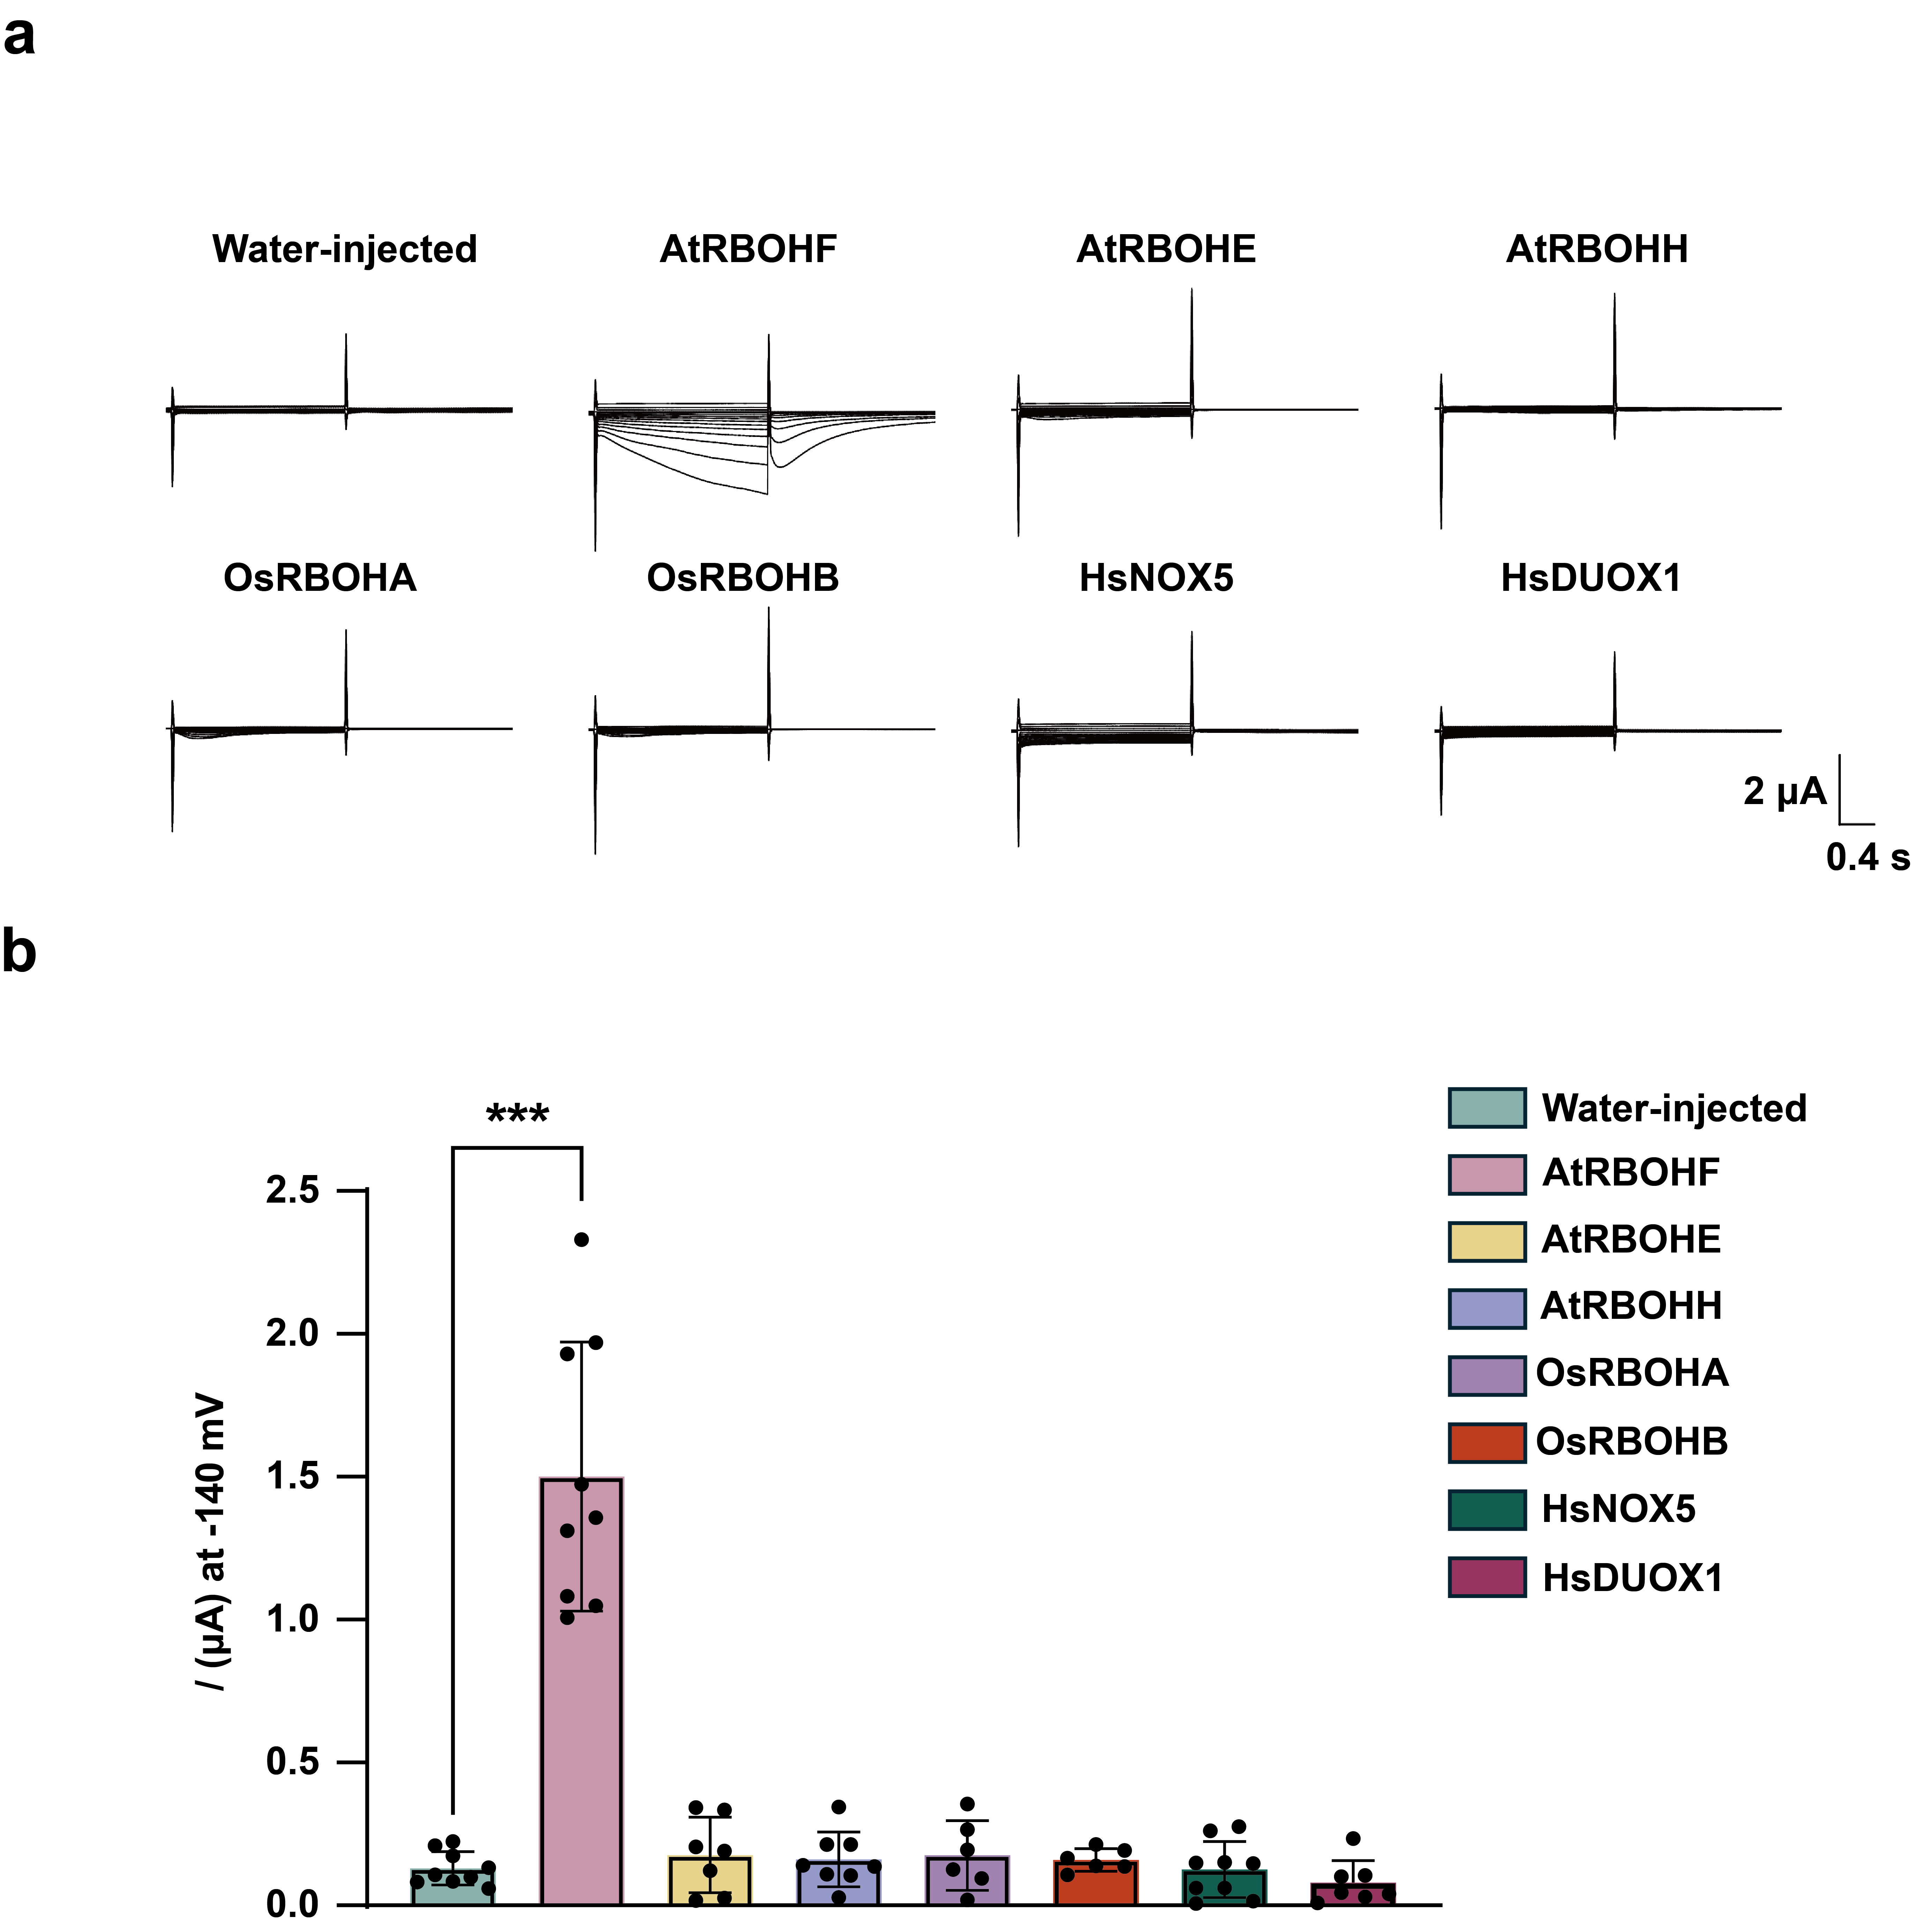
**

**Extended Data Fig. 6 | Analysis of calcium channel activity of plant and human NOXs in TEVC assay.**

**a-b**, The cRNAs of homologous genes of NOXs/RBOHs from different species were injected into *Xenopus* oocytes, and the current values were recorded by TEVC assay under 30 mM CaCl2 perfusate (**a**). The chart shows the currents of different samples at -140 mV (**b**). *P* values are calculated from two-sided Student's *t*-tests. Data are presented as mean ± s.d., and n≥6 biologically independent oocytes.

**
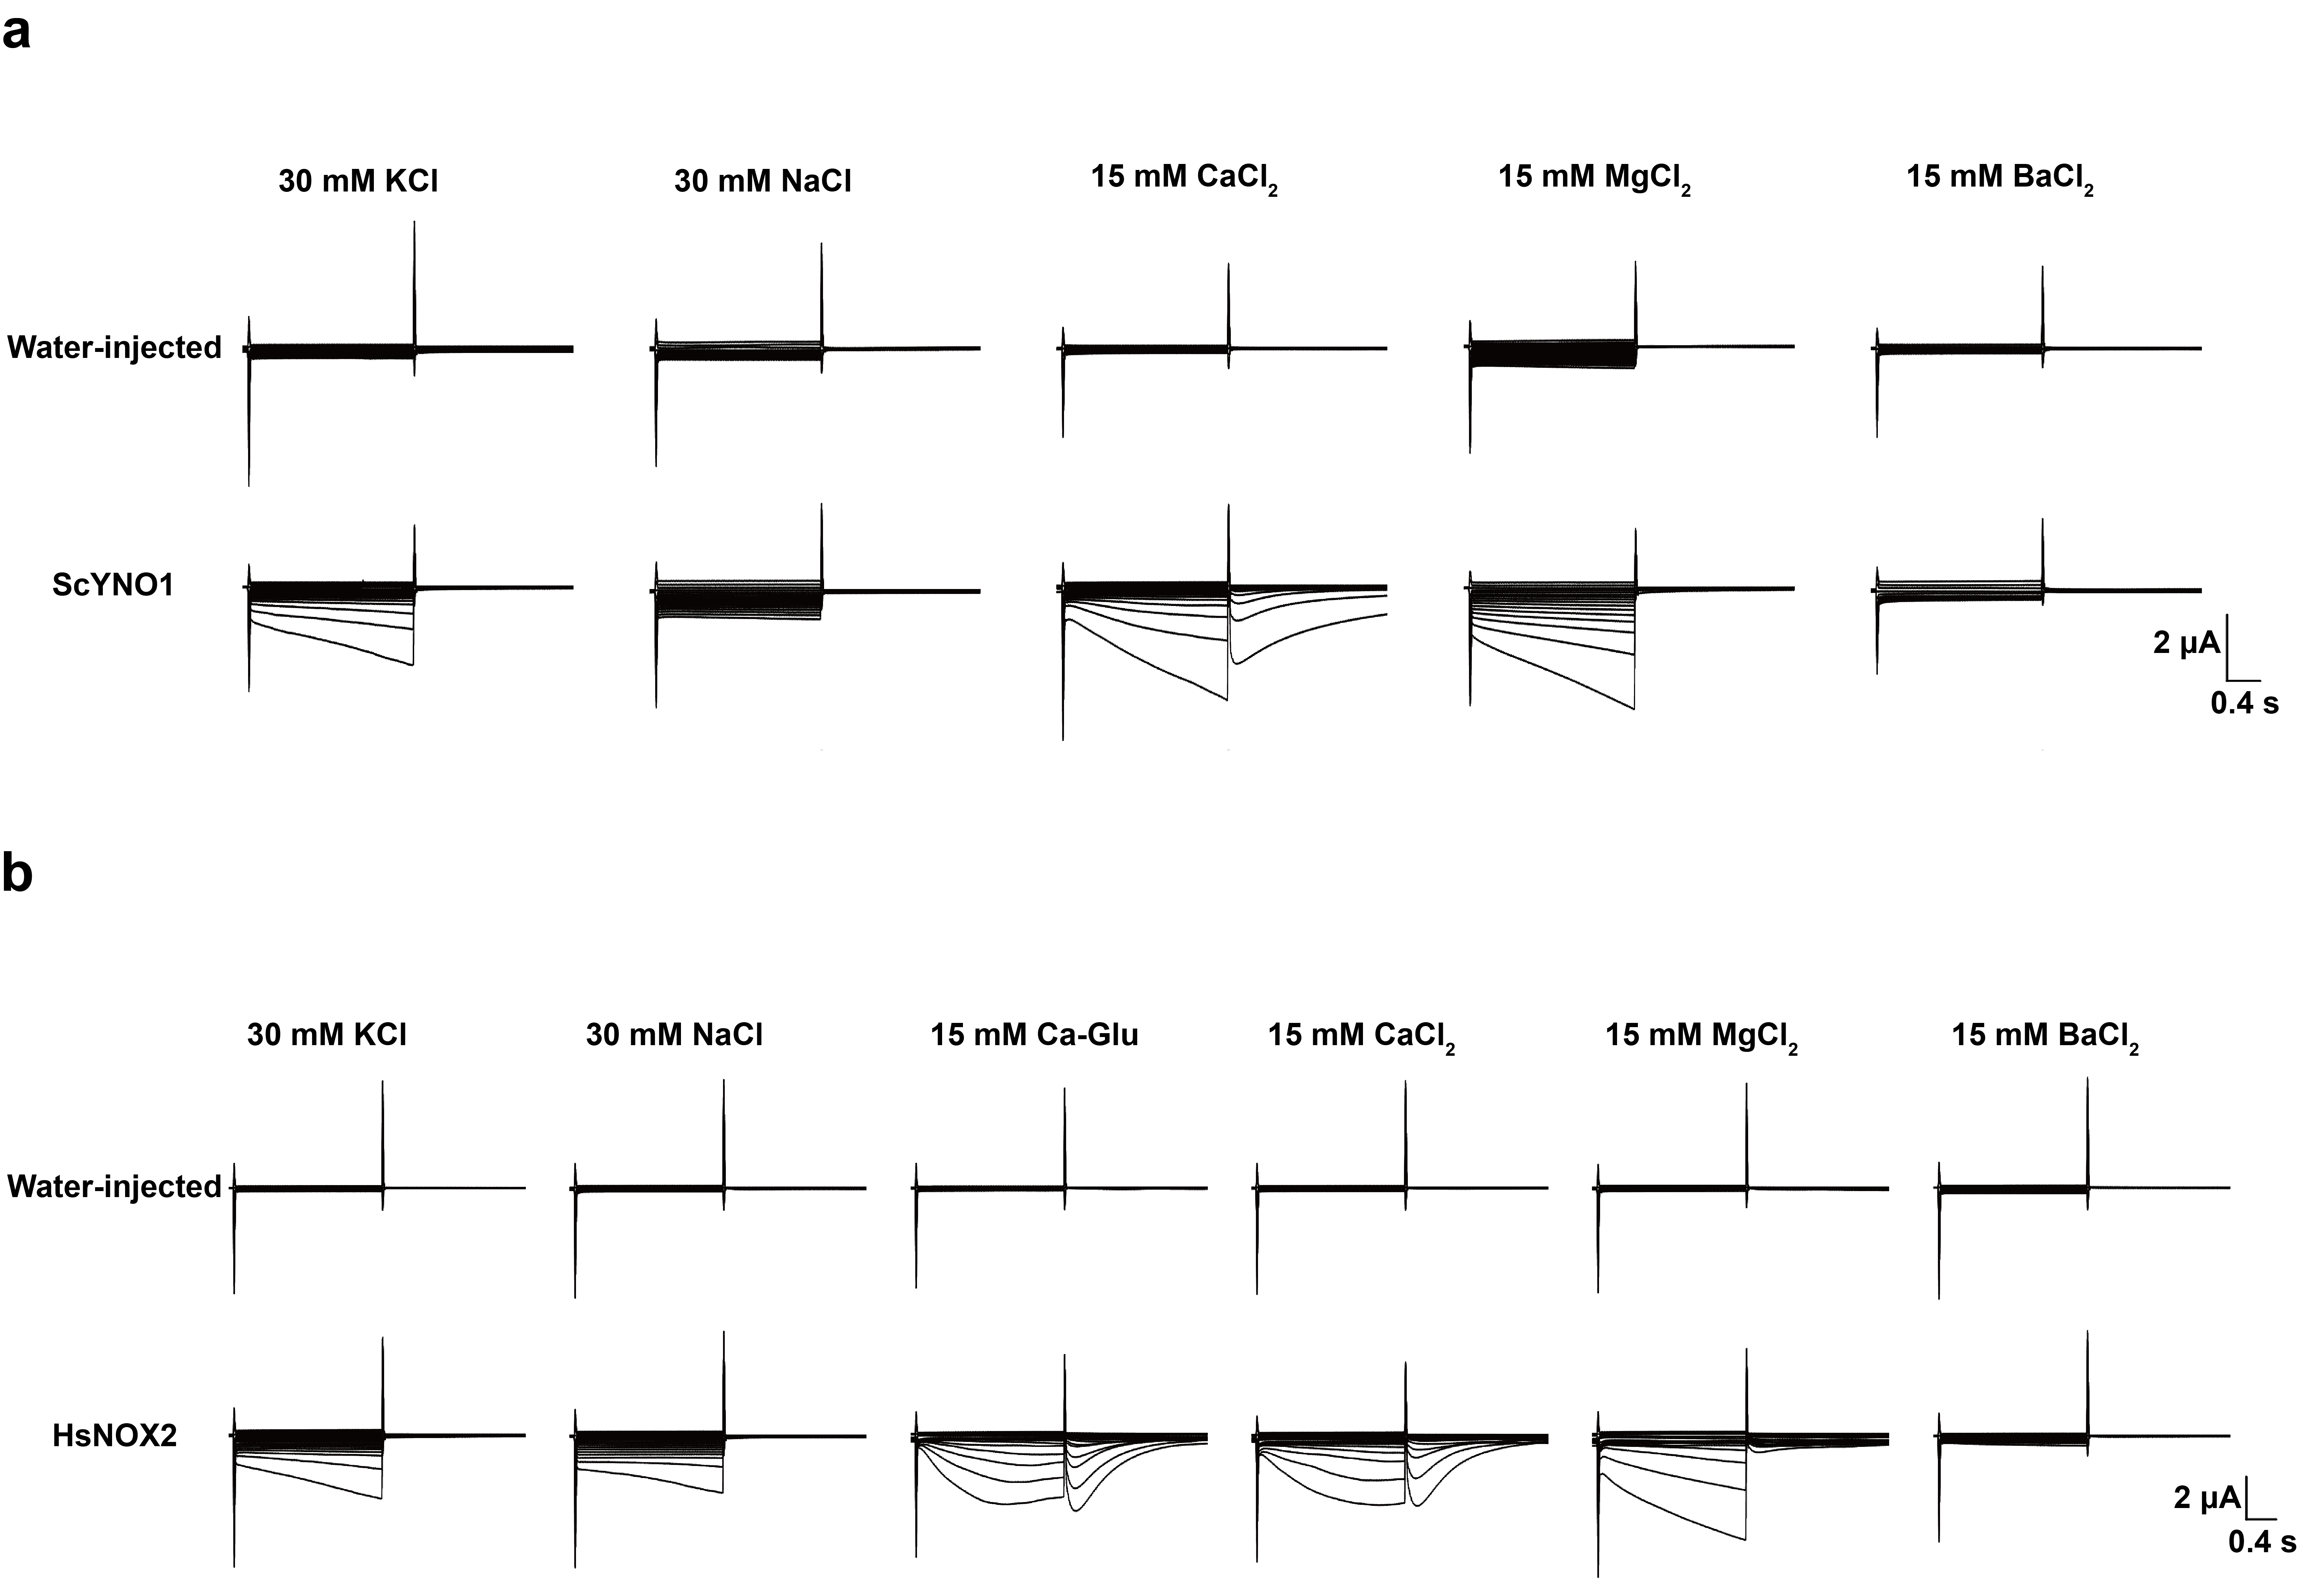
**

**Extended Data Fig. 7 | Ion selectivity of ScYNO1 and HsNOX2.**

**a**, The currents of *Xenopus* oocytes expressing ScYNO1 cRNA were recorded in perfusion buffer containing 30 mM KCl, 30 mM NaCl, 15 mM CaCl2, 15 mM MgCl2 and 15 mM BaCl2 by TEVC assay. **b**, The currents of *Xenopus* oocytes expressing HsNOX2 cRNA were recorded in perfusion buffer containing 30 mM KCl, 30 mM NaCl, 15 mM CaCl2, 15 mM MgCl2 and 15 mM BaCl2 by TEVC assay.


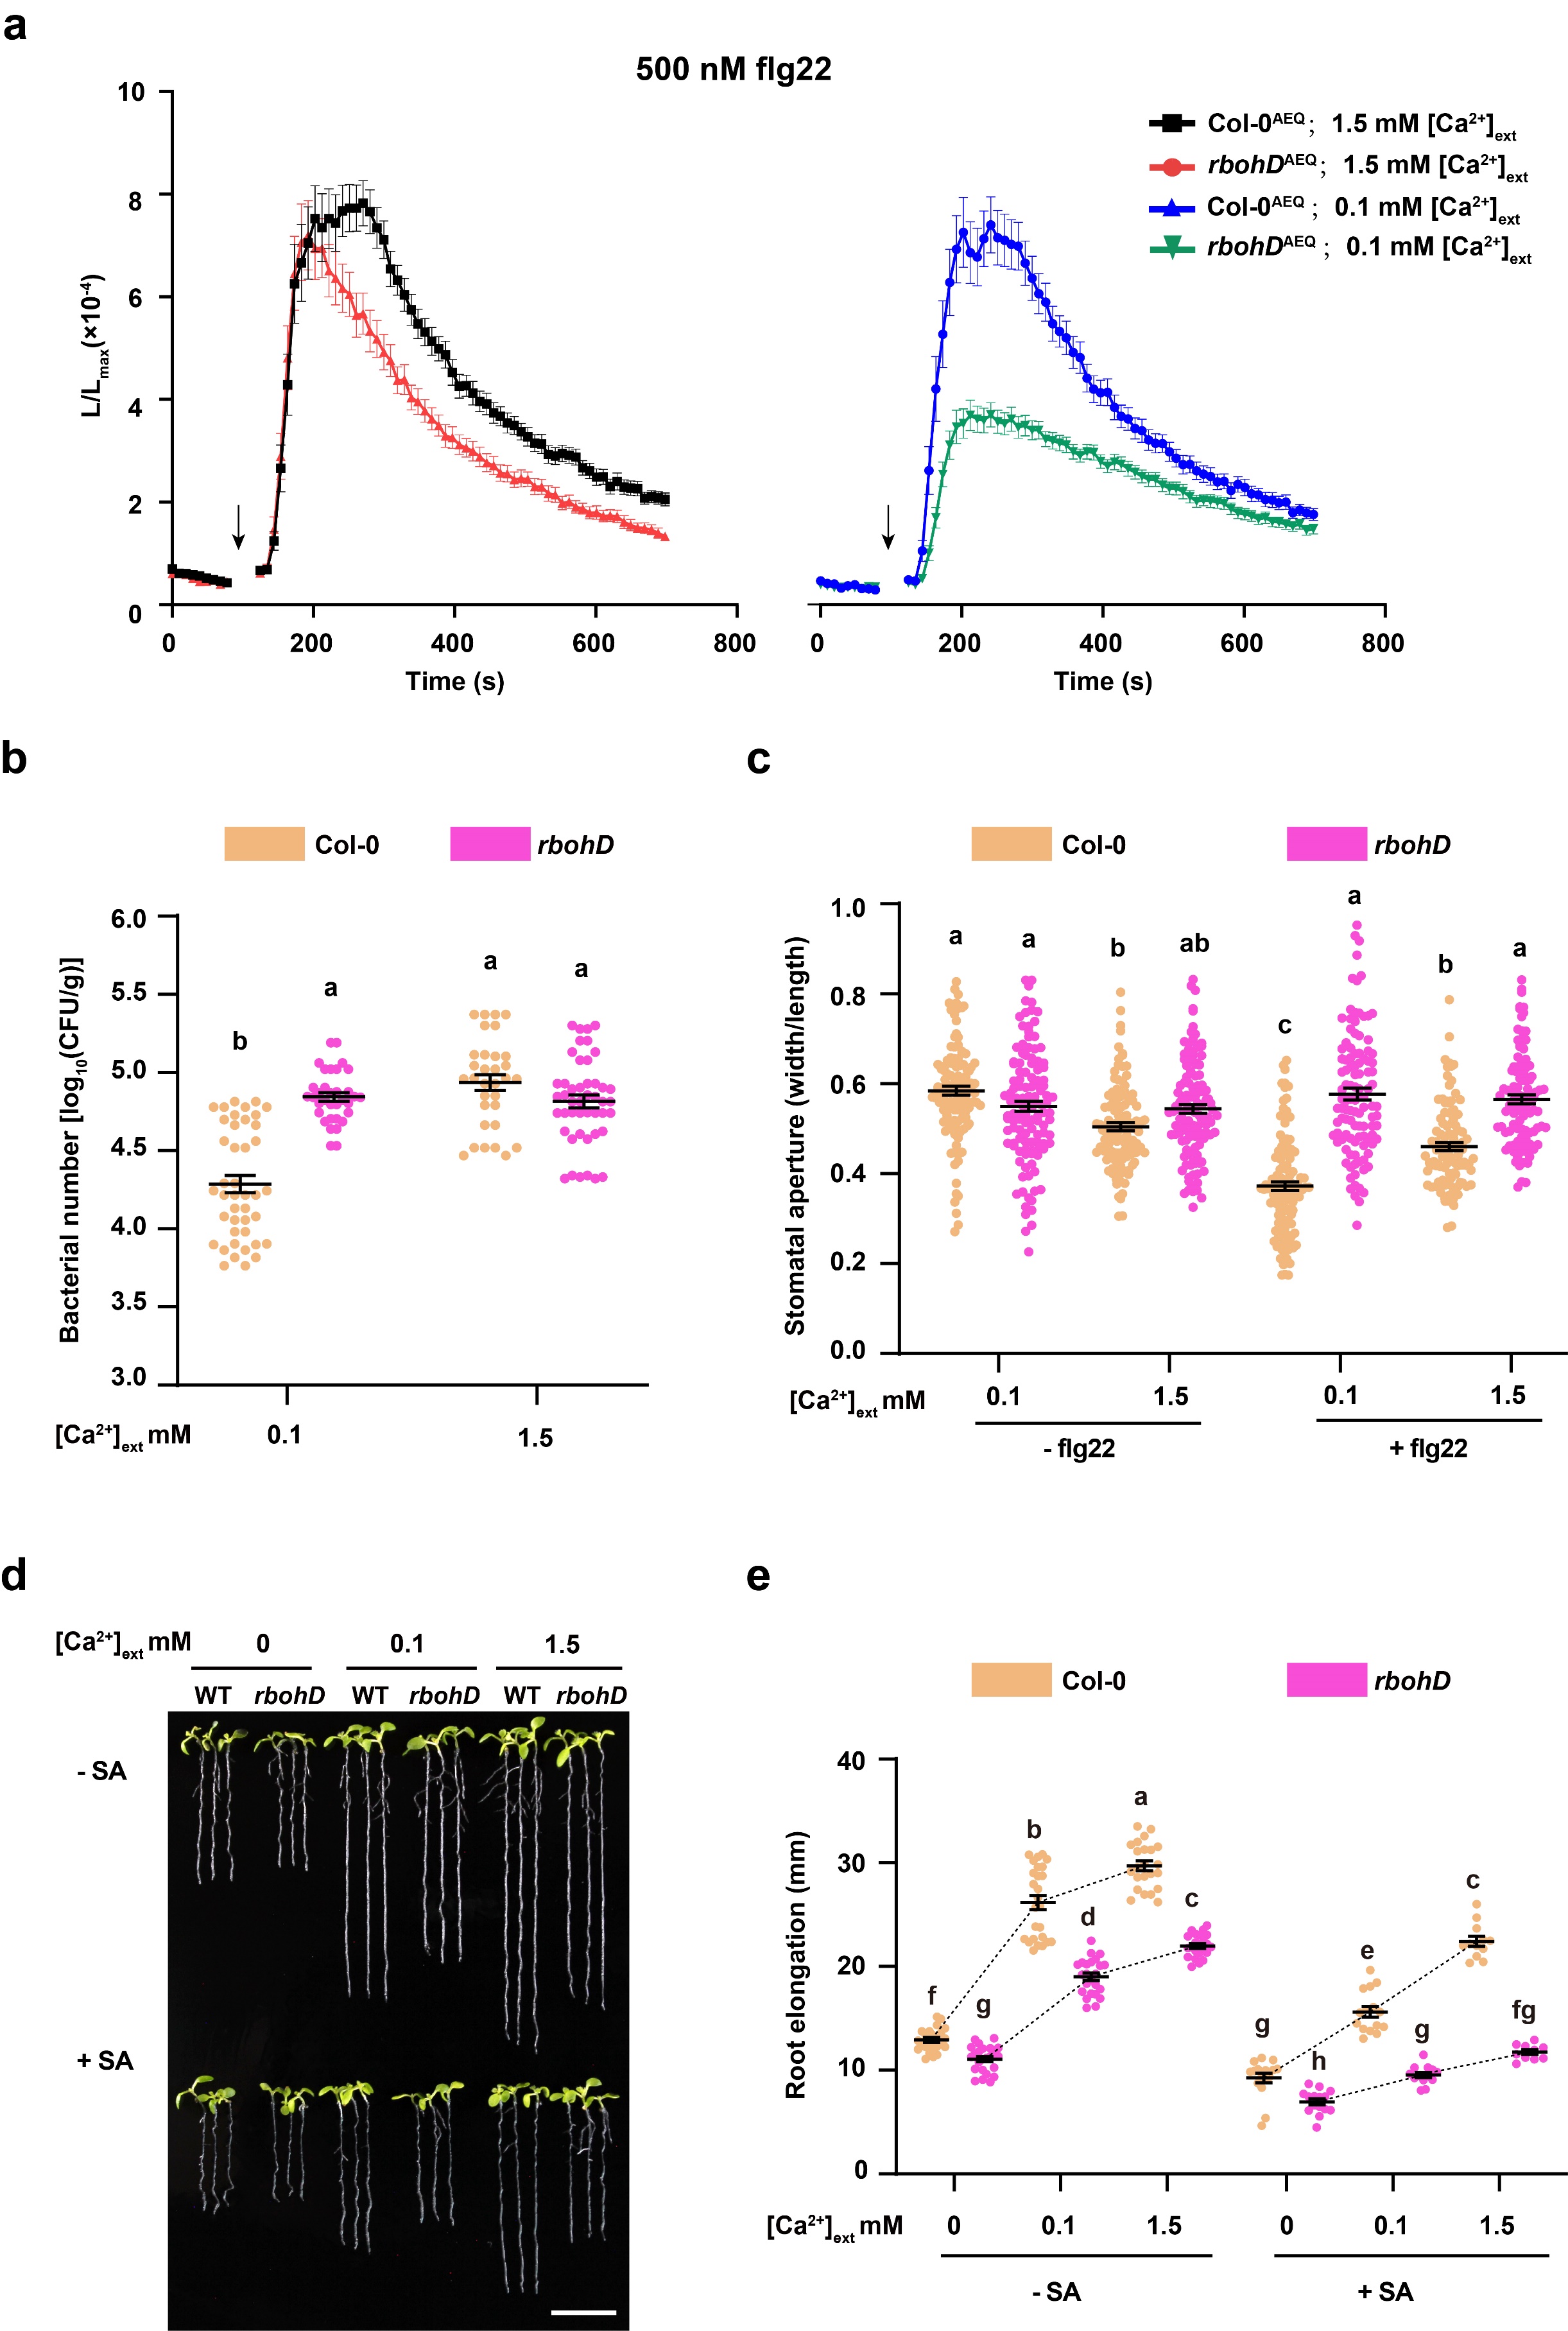


**Extended Data Fig. 8 | Physiological function of RBOHD in response to abiotic stimuli is dependent of extra Ca2+ concentrations.**

**a**, The changes of [Ca2+]cyt in Col-0AEQ and *rbohD*AEQ seedlings induced by 500 nM flg22. Data are presented as mean ± s.e.m. and n≥50 biologically independent seedlings. **b**, Measurement of bacterial growth on seedlings of WT and *rbohD* under 0.1 and 1.5 mM CaCl2 treatment. **c**, The stomatal opening measurement of 4-week-old plants grown under 0.1 and 1.5 mM CaCl2 with or without 1 μM flg22 treatment. **d**, **e**, Root phenotypes (**d**) androot elongation measurement (**e**) of WT and *rbohD* under 0, 0.1 and 1.5 mM CaCl2 with or without 20 μM SA treatment. Data are presented as mean ± s.e.m. (**b**, **c**, **e**) and statistical significance was determined using two-way (**b**) or three-way (**c**, **e**) analysis of variance (ANOVA) and multiple comparison by the Tukey's method.
