# Supplementary material for: The ROS-producing enzyme NADPH oxidase/RBOH is a Ca2+ channel regulated by protons in the eukaryotic kingdom
Source: Research Square preprint supplement (doi:10.21203/rs.3.rs-4840681/v1), 2024-08-07
Supplement: Supplementary file 2 [file ec147dbf2fc88aeb0bbda199.xlsx]

## Sheet: Plasmids list
For TEVC experiment in Xenopus oocytes	PGEMHE-AtRBOHC
	PGEMHE-AtRBOHD
	PGEMHE-AtRBOHE
	PGEMHE-AtRBOHF
	PGEMHE-AtRBOHH
	PGEMHE-ScYNO1
	PGEMHE-SpNOX
	PGEMHE-HsNOX2
	PGEMHE-HsNOX5
	PGEMHE-HsDUOX1
	PGEMHE-OsRBOHA
	PGEMHE-OsRBOHB
For Ca2+ imaging in HEK293T	PBudCE4.1-AtRBOHC-GCaMP6s
	PBudCE4.1-AtRBOHD-GCaMP6s
	PBudCE4.1-AtCNGC14-GCaMP6s
	PBudCE4.1-OsRBOHA-GCaMP6s
	PBudCE4.1-OsRBOHB-GCaMP6s
	PBudCE4.1-HsNOX2-GCaMP6s
	PBudCE4.1-HsNOX5-GCaMP6s
	PBudCE4.1-ScYNO1-GCaMP6s
	PBudCE4.1-SpNOX-GCaMP6s
Yeast	YEP124-AtRBOHC
	YEP124-AtRBOHD
	YEP124-AtCNGC14
	YEP124-SpNOX
	YEP124-ScYNO1
	YEP124-HsNOX2
	YEP124-HsNOX5
	YEP124-OsRBOHB

## Sheet: Primers list
Vectors	Primer name	Sequence (5' > 3')
PBudCE4.1-AtRBOHC-GCaMP6s	pBud-AtRBOHC-F	ACTATAGGGAGACCCAAGCTTATGTCTAGAGTGAGTTTTGAAGTGTCAG
	pBud-AtRBOHC-R	GATGAGTTTTTGTTCGGATCCTTAGAAATTCTCTTTGTGGAAGGAGA
PBudCE4.1-AtRBOHD-GCaMP6s	pBud-AtRBOHD-F	ACTATAGGGAGACCCAAGCTTATGAAAATGAGACGAGGCAATTC
	pBud-AtRBOHD-R	GATGAGTTTTTGTTCGGATCCCTAGAAGTTCTCTTTGTGGAAGTCAAA
PBudCE4.1-AtCNGC14-GCaMP6s	pBud-AtCNGC14-F	ACTATAGGGAGACCCAAGCTTATGGAGTTCAAGAGAGACAATACTGTCA
	pBud-AtCNGC14-R	TTTTTGTTCGGATCCTCTAGATCAATCATCCACTGAGAAATCCG
PBudCE4.1-OsRBOHA-GCaMP6s	pBud-OsRBOHA-F	ACTATAGGGAGACCCAAGCTTATGACGGAATCGAAGGAGTTCG
	pBud-OsRBOHA-R	GATGAGTTTTTGTTCGGATCCTCAGAAATGCTCCTTATGGAATTCG
PBudCE4.1-OsRBOHB-GCaMP6s	pBud-OsRBOHB-F	ACTATAGGGAGACCCAAGCTTATGGCTGACCTGGAAGCAGG
	pBud-OsRBOHB-R	GATGAGTTTTTGTTCGGATCCTTAGAAGTTCTCCTTGTGGAAATCAA
PBudCE4.1-HsNOX2-GCaMP6s	pBud-HsNOX2-F	ACTATAGGGAGACCCAAGCTTATGGGGAACTGGGCTGTGA
	pBud-HsNOX2-R	GATGAGTTTTTGTTCGGATCCTTAGAAGTTTTCCTTGTTGAAAATGAA
PBudCE4.1-HsNOX5-GCaMP6s	pBud-HsNOX5-F	ACTATAGGGAGACCCAAGCTTATGAACACATCTGGAGACCCAGC
	pBud-HsNOX5-R	GATGAGTTTTTGTTCGGATCCTTAGAAATTCTCTTGGAAAAATCTGAA
PBudCE4.1-ScYNO1-GCaMP6s	pBud-ScYNO1-F	ACTATAGGGAGACCCAAGCTTATGAAAGAATCCCCTCTCATAACG
	pBud-ScYNO1-R	GATGAGTTTTTGTTCGGATCCTCATAATCCGTAAGTCTCACAGACAA
PBudCE4.1-SpNOX-GCaMP6s	pBud-SpNOX-F	ACTATAGGGAGACCCAAGCTTATGGAATTTTCTATGAAATCAGTCAAA
	pBud-SpNOX-R	GATGAGTTTTTGTTCGGATCCTTATTTGAACTTGAATCCTTCGTAAAT
PGEMHE-AtRBOHC	pGE-AtRBOHC-F	AGATCAATTCCCCGGGGATCCATGTCTAGAGTGAGTTTTGAAGTGTCAG
	pGE-AtRBOHC-R	AGTGGTAACCAGATCAAGCTTCTTAGAAATTCTCTTTGTGGAAGGAGA
PGEMHE-AtRBOHD	pGE-AtRBOHD-F	AGATCAATTCCCCGGGGATCCATGAAAATGAGACGAGGCAATTC
	pGE-AtRBOHD-R	AGTGGTAACCAGATCAAGCTTCTAGAAGTTCTCTTTGTGGAAGTCAAA
PGEMHE-AtRBOHE	pGE-AtRBOHE-F	AGATCAATTCCCCGGGGATCCATGAAGTTATCGCCTCTGAGTTTCT
	pGE-AtRBOHE-R	AGTGGTAACCAGATCAAGCTTTTAGAAATGCTCCTTATGGAACTCG
PGEMHE-AtRBOHF	pGE-AtRBOHF-F	AGATCAATTCCCCGGGGATCCATGAAACCGTTCTCAAAGAACGA
	pGE-AtRBOHF-R	AGTGGTAACCAGATCAAGCTTTTAGAAATGCTCCTTGTGAAATTCA
PGEMHE-AtRBOHH	pGE-AtRBOHH-F	AGATCAATTCCCCGGGGATCCATGAAAAGTAACACTCCTACGGAGG
	pGE-AtRBOHH-R	AGTGGTAACCAGATCAAGCTTTTAAAAATTTTCCTTGTGGAAAGTAAA
PGEMHE-ScYNO1	pGE-ScYNO1-F	AGATCAATTCCCCGGGGATCCATGAAAGAATCCCCTCTCATAACG
	pGE-ScYNO1-R	AGTGGTAACCAGATCAAGCTTTCATAATCCGTAAGTCTCACAGACAA
PGEMHE-SpNOX	pGE-SpNOX-F	AGATCAATTCCCCGGGGATCCATGGAATTTTCTATGAAATCAGTCAAA
	pGE-SpNOX-R	AGTGGTAACCAGATCAAGCTTTTATTTGAACTTGAATCCTTCGTAAAT
PGEMHE-HsNOX2	pGE-HsNOX2-F	AGATCAATTCCCCGGGGATCCATGGGGAACTGGGCTGTGA
	pGE-HsNOX2-R	AGTGGTAACCAGATCAAGCTTTTAGAAGTTTTCCTTGTTGAAAATGAA
PGEMHE-HsNOX5	pGE-HsNOX5-F	AGATCAATTCCCCGGGGATCCATGAACACATCTGGAGACCCAGC
	pGE-HsNOX5-R	AGTGGTAACCAGATCAAGCTTTTAGAAATTCTCTTGGAAAAATCTGAA
PGEMHE-HsDUOX1	pGE-HsDUOX1-F	AGATCAATTCCCCGGGGATCCATGGGCTTCTGCCTGGCT
	pGE-HsDUOX1-R	AGTGGTAACCAGATCAAGCTTCTAGAAGTTCTCATAATGGTGGGAGA
PGEMHE-OsRBOHA	pGE-OsRBOHA-F	AGATCAATTCCCCGGGGATCCATGACGGAATCGAAGGAGTTCG
	pGE-OsRBOHA-R	AGTGGTAACCAGATCAAGCTTTCAGAAATGCTCCTTATGGAATTCG
PGEMHE-OsRBOHB	pGE-OsRBOHB-F	AGATCAATTCCCCGGGGATCCATGGCTGACCTGGAAGCAGG
	pGE-OsRBOHB-R	AGTGGTAACCAGATCAAGCTTTTAGAAGTTCTCCTTGTGGAAATCAA
YEP124-AtRBOHD	YEP-AtRBOHD-F	AAGCATACAATCAAGGAATTCATGAAAATGAGACGAGGCAATTC
	YEP-AtRBOHD-R	CCGGGTACCGAGCTCGAATTCCTAGAAGTTCTCTTTGTGGAAGTCAAA
YEP124-AtCNGC14	YEP-AtCNGC14-F	AAGCATACAATCAAGGAATTCATGGAGTTCAAGAGAGACAATACTGTCA
	YEP-AtCNGC14-R	ATACTAGTCAGATCTCCCGGGCCATCATCCACTGAGAAATCCGGC
YEP124-SpNOX	YEP-SpNOX-F	AAGCATACAATCAAGGAATTCATGGAATTTTCTATGAAATCAGTCAAA
	YEP-SpNOX-R	GAACCGGCCCAGATCCCCGGGTTATTTGAACTTGAATCCTTCGTAAAT
YEP124-ScYNO1	YEP-ScYNO1-F	AAGCATACAATCAAGGAATTCATGAAAGAATCCCCTCTCATAACG
	YEP-ScYNO1-R	GAACCGGCCCAGATCCCCGGGTCATAATCCGTAAGTCTCACAGACAA
YEP124-HsNOX2	YEP-HsNOX2-F	AAGCATACAATCAAGGAATTCATGGGGAACTGGGCTGTGA
	YEP-HsNOX2-R	GAACCGGCCCAGATCCCCGGGTTAGAAGTTTTCCTTGTTGAAAATGAA
YEP124-HsNOX5	YEP-HsNOX5-F	AAGCATACAATCAAGGAATTCATGAACACATCTGGAGACCCAGC
	YEP-HsNOX5-R	GAACCGGCCCAGATCCCCGGGTTAGAAATTCTCTTGGAAAAATCTGAA
YEP124-OsRBOHB	YEP-OsRBOHB-F	AAGCATACAATCAAGGAATTCATGGCTGACCTGGAAGCAGG
	YEP-OsRBOHB-R	GAACCGGCCCAGATCCCCGGGTTAGAAGTTCTCCTTGTGGAAATCAA
qPCR primers	P4	TTTCCACGTTTAATTGCCGC
	P5	GTGTACCAAAAGGCGTTGAA
	P6	TGGCTTCGTCATGTGTAGAG
	P7	CTTTTGGTACACCCACCATT
	ACTIN8-F	CACCACCCGAGAGGAAGTAC
	ACTIN8-R	TTCTGTGGACAATGCCTGGA
T-DNA primers	P3	GGTGCAGCAAAACCCACACTTTTACTTC
	P1	CGGGATAGTCGTCGGTGTTT
	P2	TGGGTACAGCAAGATACATCCA
Primers for the construction of yeast mutants and PCR identification	P8	gtcgccagaaacttctaatttggtaagccttccaataaatatgtctgcccctaagaagatc
	P9	agcatattgcgtaagacattattattcttttcttttccccttaagcaaggattttcttaacttcttcg
	P10	cgtttggatccaatgtggtc
	P11	tcataatccgtaagtctcacagacaaagttgatcctttcatcg
	P12	ttaagcaaggattttcttaacttcttcg
